# Supplementary material
Source: HighWire-hosted journal article supplement (https://bmjopen.bmj.com/content/12/7/e053479)
Supplement: inline-supplementary-material-1 [file inline-supplementary-material-1.pdf]

1 **Pattern of drug recalls and quality of pharmaceutical products in**  
 2 **Nepal**

3 Astha Neupane, Maheshwor Bastakoti, Sabita Tamang, Basant Giri\*  
 4 Center for Analytical Sciences, Kathmandu Institute of Applied Sciences, P. O. Box 23002,  
 5 Kathmandu, Nepal

6  
 7 **Supplementary Material**

8 Table S1: Result of literature search of peer-reviewed documents reporting drug quality data

| Keywords                                                                                                     | Number of articles found |                |               |                |
|--------------------------------------------------------------------------------------------------------------|--------------------------|----------------|---------------|----------------|
|                                                                                                              | PubMed                   | Web of Science | Springer link | Google Scholar |
| Counterfeit* OR substandard* OR fake<br>OR spurious OR unregulated OR<br>unregistered OR falsified* OR fraud | 14532                    | 51113          | 71770         | 41100          |
| Drug OR medicine OR pharmaceutical                                                                           | 4977168                  | 4579007        | 1386455       | 728000         |
| Nepal*                                                                                                       | 12868                    | 18132          | 16862         | 26500          |
| 1 AND 2 AND 3                                                                                                | 13                       | 10             | 393           | 51             |

9

10 **List of research papers that included drug quality in Nepal**

- 11 1. Poudel, Ramesh Sharma, et al. "Assessment of primary labeling of medicines manufactured by  
 12 Nepalese pharmaceutical industries." *Journal of pharmaceutical policy and practice* 11.1 (2018):  
 13 1-6.  
 14 2. Gyanwali, P., et al. "Surveillance of Quality of Medicines Available in the Nepalese Market: A  
 15 Study from Kathmandu Valley." *Journal of Nepal Health Research Council* (2015).  
 16 3. Poudel, Arjun, et al. "Assessment of the availability and rationality of unregistered fixed dose drug  
 17 combinations in Nepal: a multicenter cross-sectional study." *Global health research and policy* 2.1  
 18 (2017): 1-13.  
 19 4. Jha, A. K., et al. *Quality of essential medicines in public health care facilities of Nepal–2019*.  
 20 Nepal Health Research Council, 2019.
